# Supplementary material for: Structural basis of the activation of c-MET receptor
Source: PubMed Central journal article supplement (PMC8249616; doi:10.1038/s41467-021-24367-3), 2021-07-01
Supplement: 41467_2021_24367_MOESM1_ESM.pdf [file 41467_2021_24367_MOESM1_ESM.pdf]

**Supplementary Information**

**Structural basis of the activation of c-MET receptor**

**Uchikawa et al.**

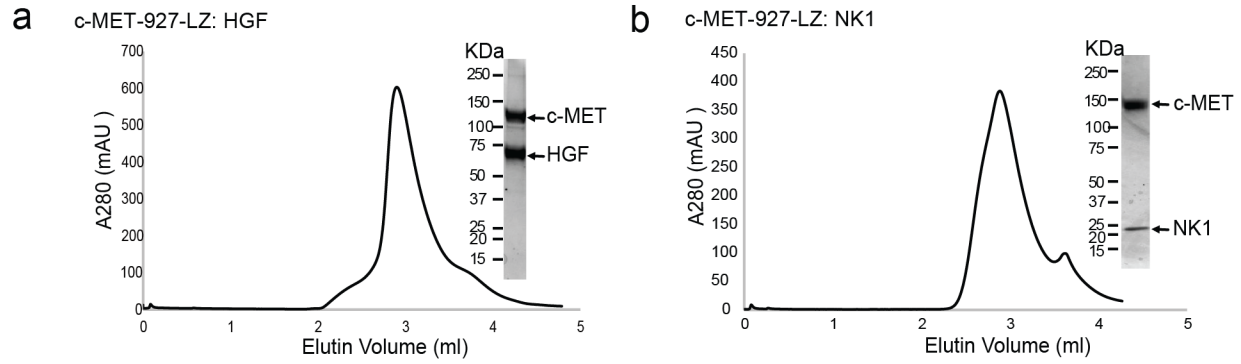

**Supplementary Figure 1. Reconstitutions of c-MET/HGF and c-MET/NK1 complexes.**

The representative SEC profiles and SDS-PAGE analyses of the c-MET927-LZ/HGF (**a**) and c-MET927-LZ/NK1 (**b**) complexes, from N = 3 repeats. Heparin was added in both samples to promote the complex formation. C-MET/HGF or c-MET/NK1 were co-eluted in SEC, suggesting that the complexes were stably formed and remained intact during SEC.

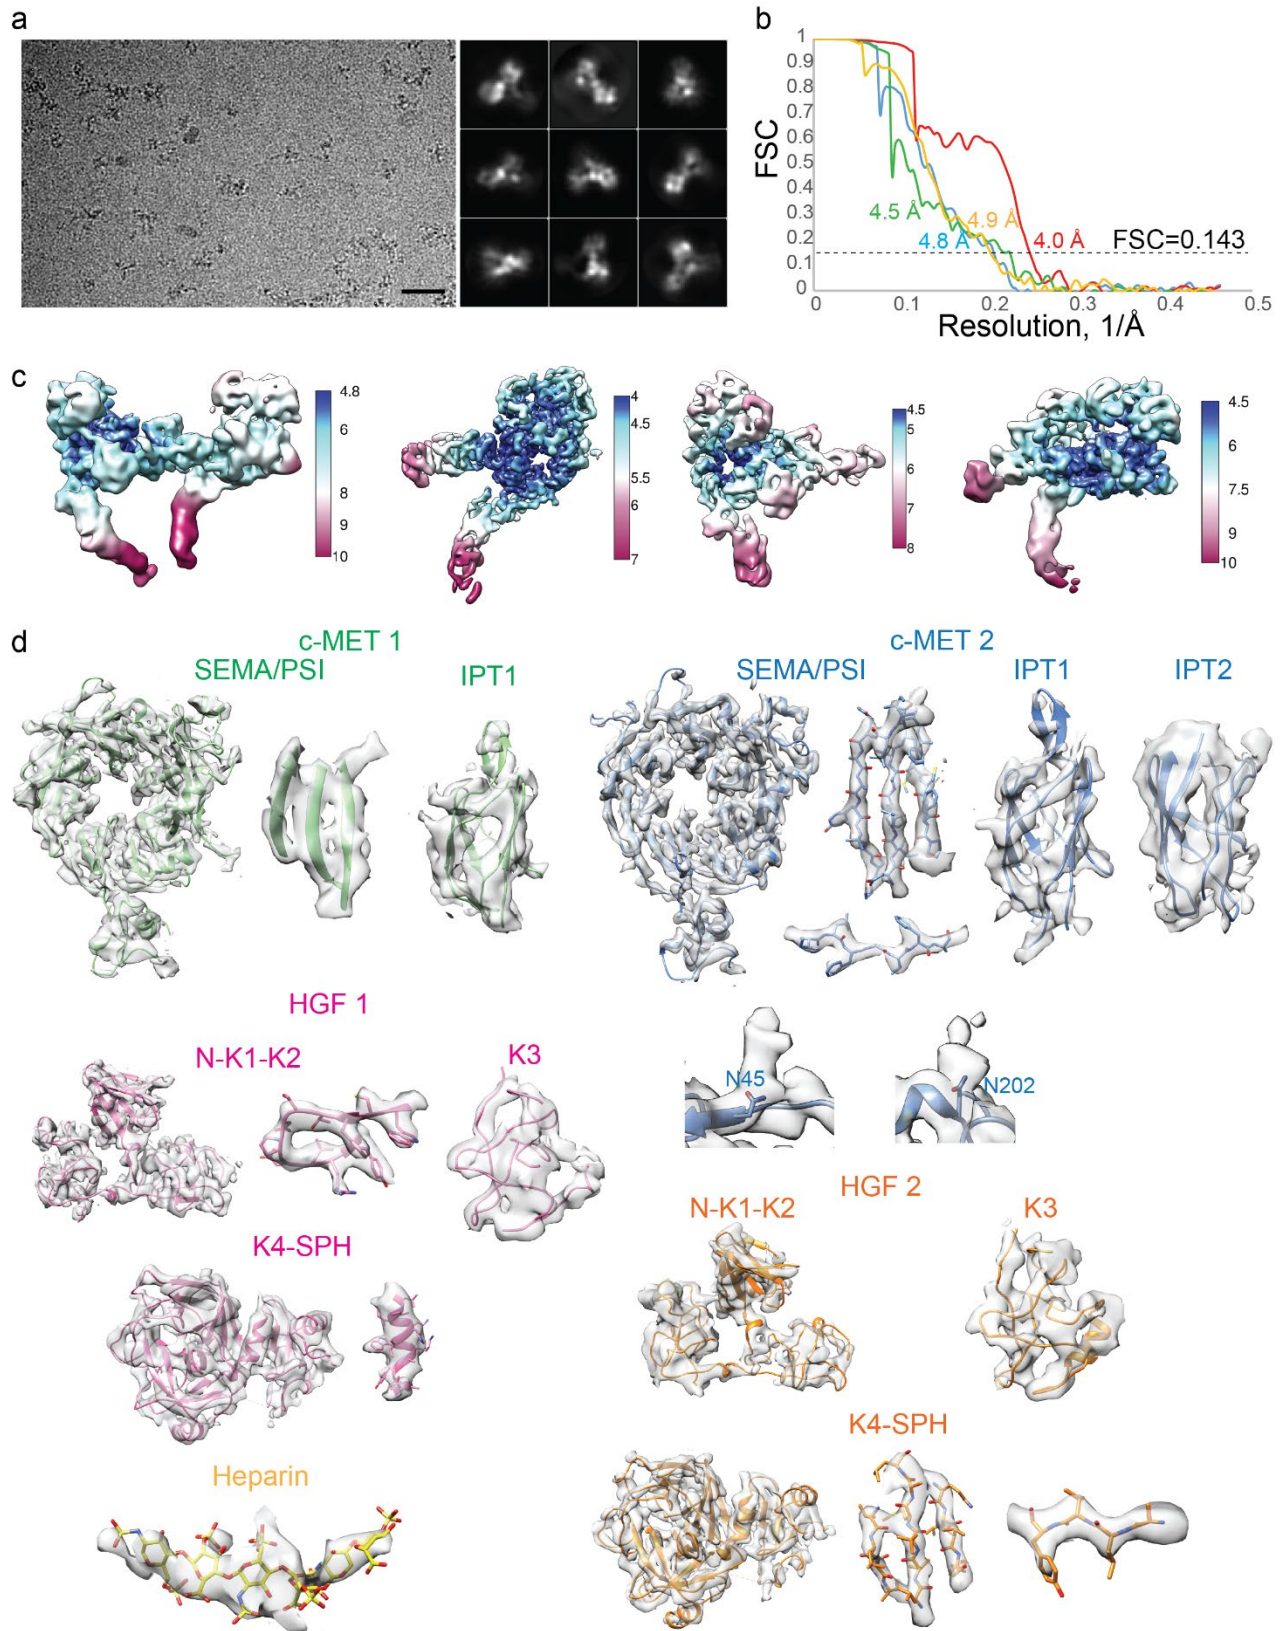

Supplementary Figure 2. Cryo-EM analysis of c-MET927-LZ/HGF complex

**(a)** Representative electron micrograph from total 8,100 micrographs and 2D class averages of c-MET927-LZ/HGF complex. Scale bar: 50 nm. **(b)** Gold-standard Fourier shell correlation (FSC) curve for the cryo-EM maps. Blue: cryo-EM map of holo-complex (2:2 c-MET/HGF complex). Red: cryo-EM map of sub-complex (1:2 c-MET/HGF complex). Green: cryo-EM map of c-MET I and HGF I obtained by focused refinement of holo-complex. Yellow: cryo-EM map of sub-complex after further 3D classification. A complete version of HGF II was resolved in this map. **(c)** Cryo-EM maps of c-MET/HGF complexes colored by local resolution. From left to right: cryo-EM map of holo-complex; cryo-EM map of sub-complex; cryo-EM map of c-MET I and HGF I obtained by focused refinement of holo-complex; cryo-EM map of sub-complex after further 3D classification, resolving the intact HGF II. **(d)** Representative cryo-EM densities of various parts of the c-MET/HGF complexes.

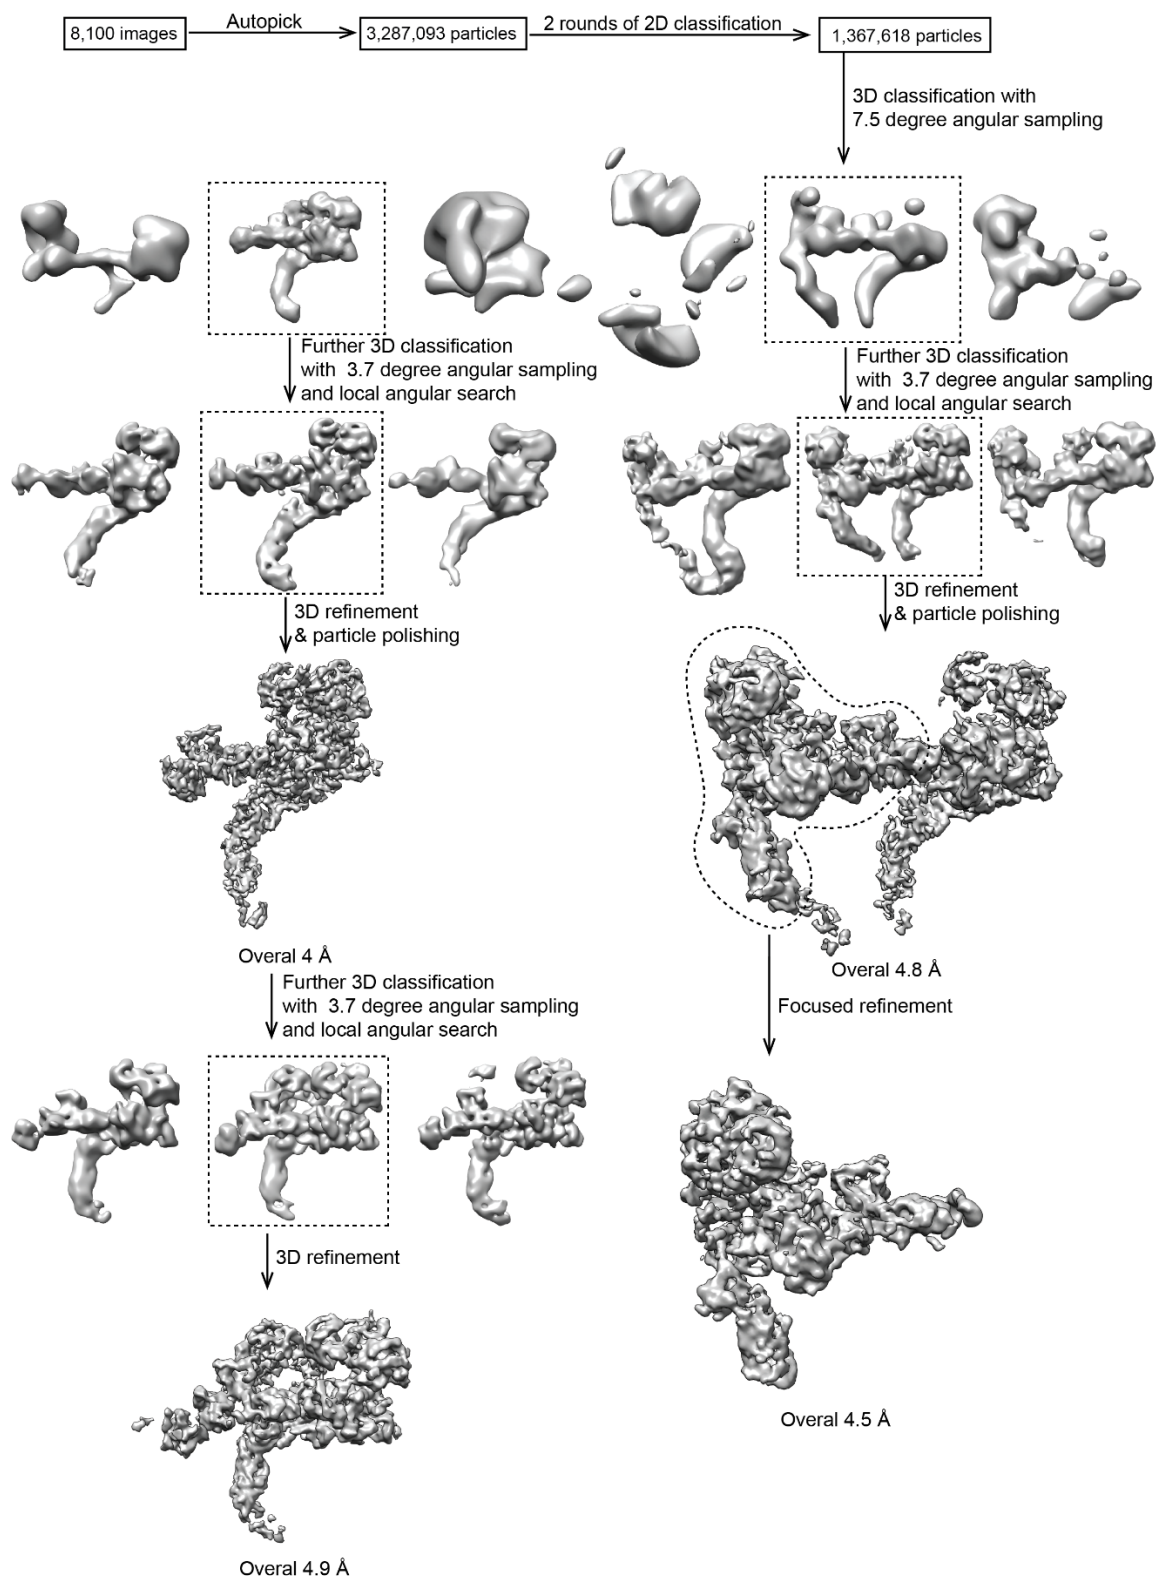

**Supplementary Figure 3. Flowchart of cryo-EM data processing of c-MET/HGF dataset.**

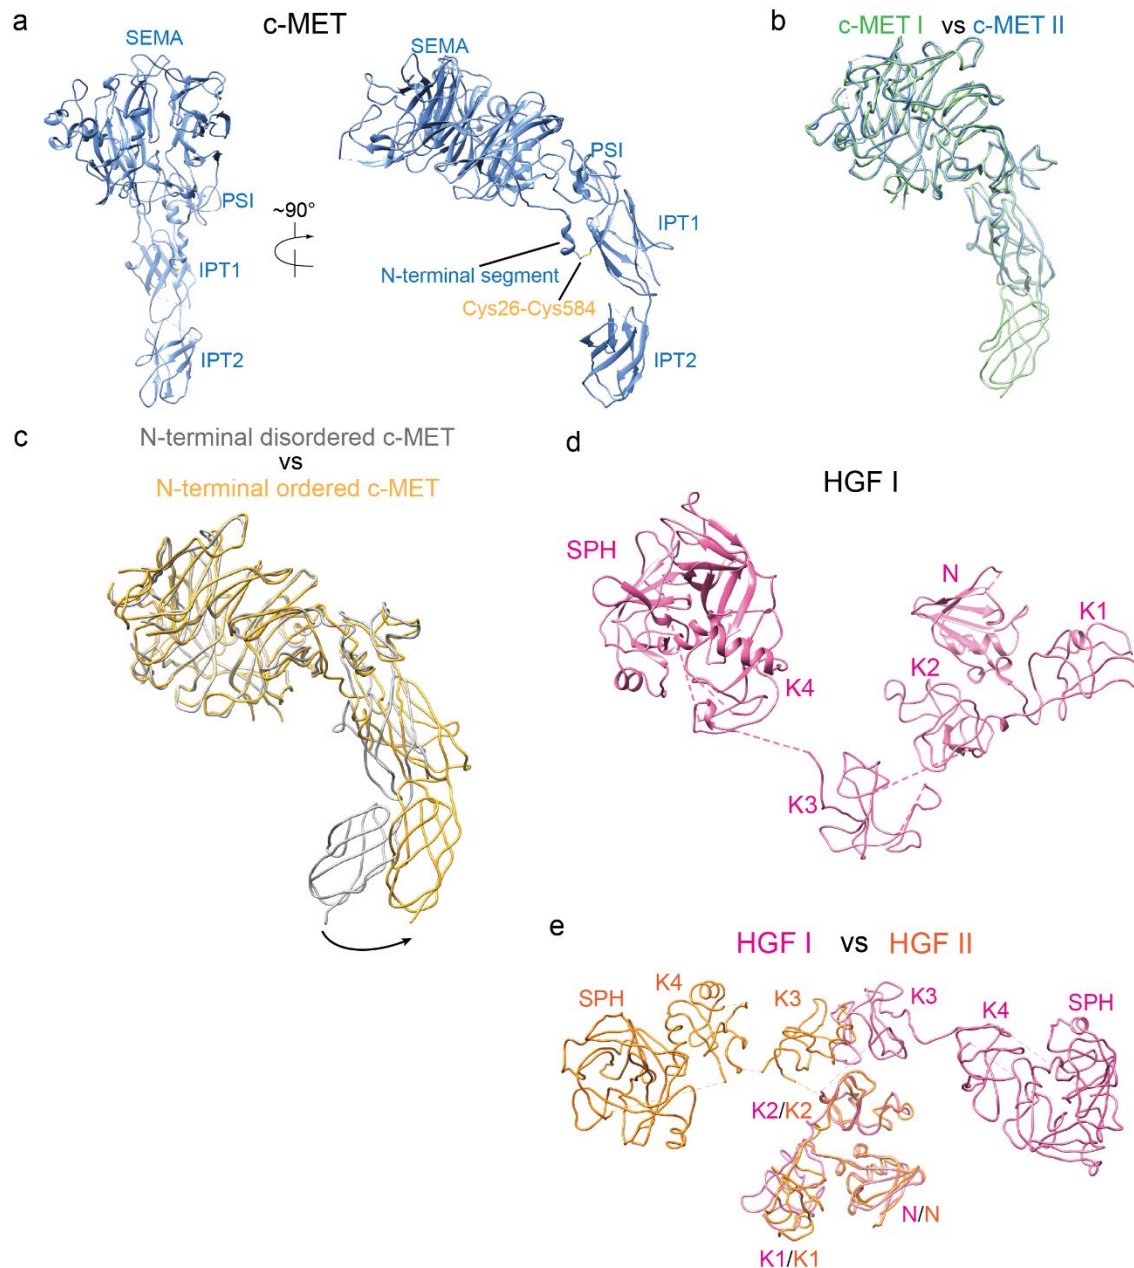

**Supplementary Figure 4. The structure of c-MET extracellular domain and HGF.**

(a) Overall structure of the c-MET extracellular region. The intramolecular disulfide bond (Cys26-Cys584) that links the N-terminal segment to the IPT1 domain is shown as yellow stick. (b) Superposition between c-MET I (green) and c-MET II (blue) by aligning the SEMA domain. (c) Superposition between N-terminal disordered c-MET from PDB ID: 2UZ<sup>X</sup><sup>1</sup> (grey) and N-terminal ordered c-MET from the cryo-EM structure of c-MET/HGF complex (yellow) by aligning the SEMA domain, revealing conformational change on the stalk region (indicated by an arrow). (d) Modular structure of the HGF. (e) Superposition between HGF I (pink) and HGF II (yellow) by aligning the two NK2 domains, showing the structural relocation of K3-K4-SPH segment in relative to NK2.

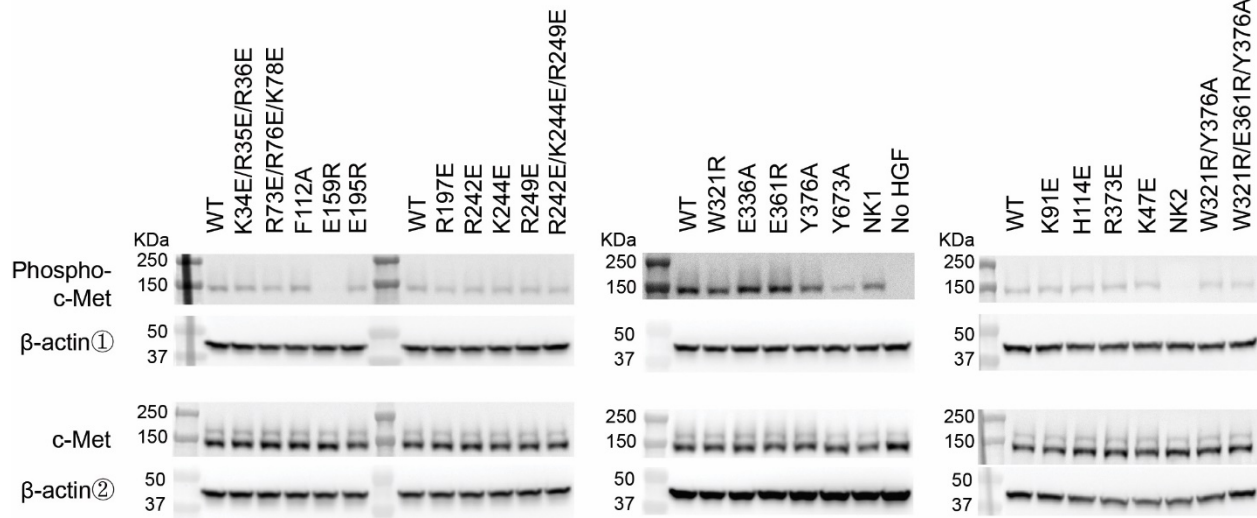

**Supplementary Figure 5. HGF WT or mutants endow differential agonist activities.**

Representative western blotting of Phospho-c-MET (Tyr1234/1235), c-MET, and loading control  $\beta$ -actin from N = 3 biological repeats. H1299 cells (~ 60% confluent in 6 well plate) was stimulated with 200 ng HGF (WT or mutant) for 10 min at 37°C. The agonist activity of each HGF variant was calculated following the formula:  $(\text{Phospho-c-Met}/\beta\text{-actin}①)/(\text{c-MET}/\beta\text{-actin}②)$ , and the presented agonist activity was normalized to HGF WT. Actin1 is the loading control for phospho-c-MET, while actin2 is the loading control for c-MET. Source data are provided as a Source Data file.

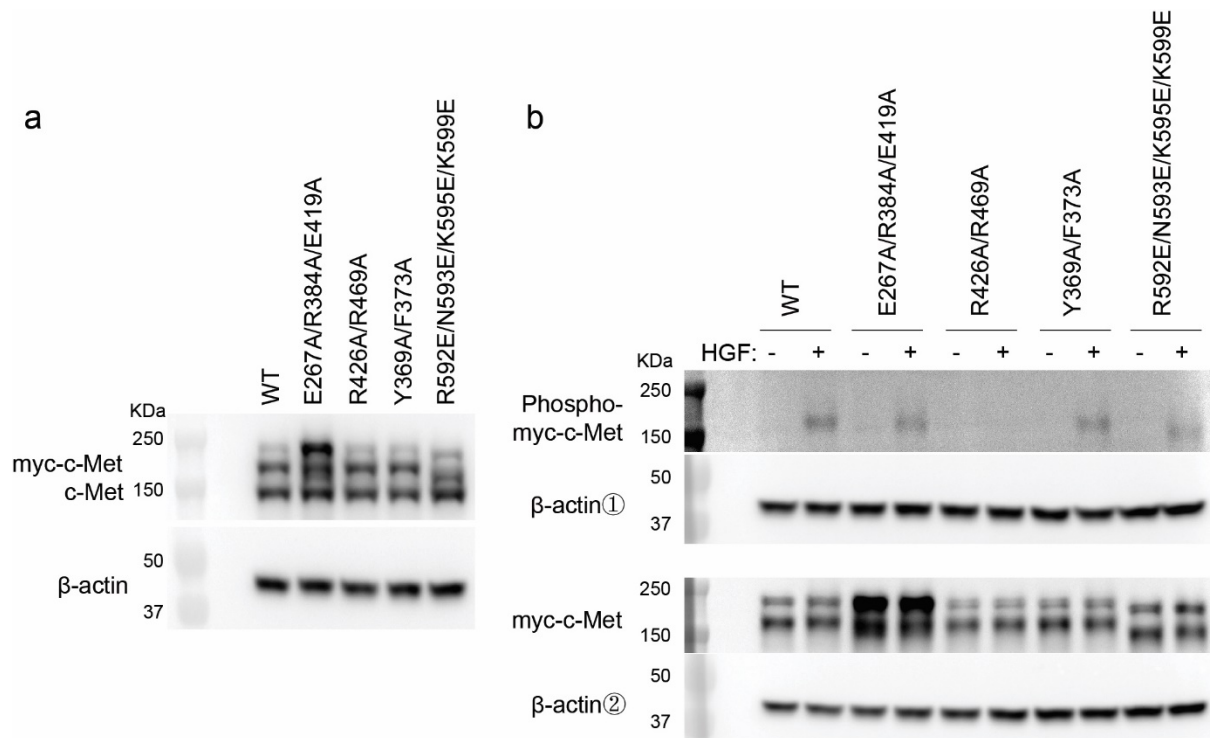

**Supplementary Figure 6. HGF-induced auto-phosphorylation of c-MET in H1299 cells expressing full-length myc-tagged c-MET WT or mutants.**

(a) H1299 cells stably express myc-c-MET (WT or mutants) were selected for functional assays. (b) Representative western blotting of Phospho-c-MET (Tyr1234/1235), c-MET, and loading control β-actin from N = 5 biological repeats. Endogenous c-MET was depleted by siRNA in H1299 cells stably expressing myc-c-MET, and then 200 ng HGF WT was applied for 10 min at 37°C to stimulate the phosphorylation of myc-c-MET. The phosphorylation capacity of each myc-c-MET WT or mutants was calculated following the formula: (Phospho-myc-c-MET/β-actin ①)/(myc-c-MET/ β-actin②). Here the basal auto-phosphorylation of myc-c-MET was subtracted for each variant and the presented agonist activity was normalized to myc-c-MET WT. Actin1 is the loading control for phospho-c-MET, while actin2 is the loading control for c-MET. Source data are provided as a Source Data file.



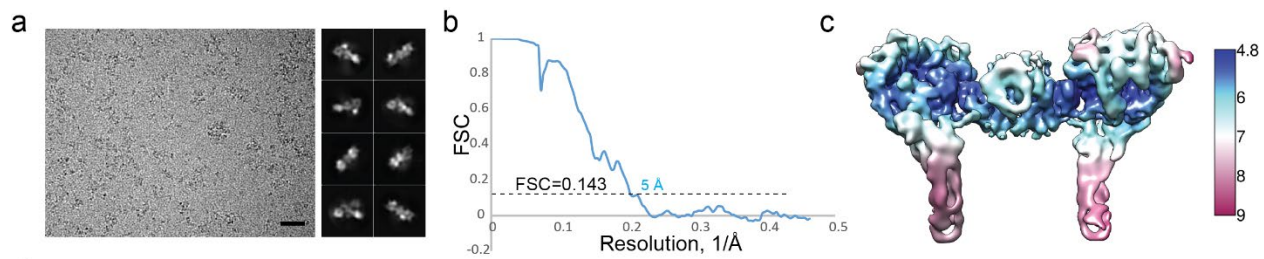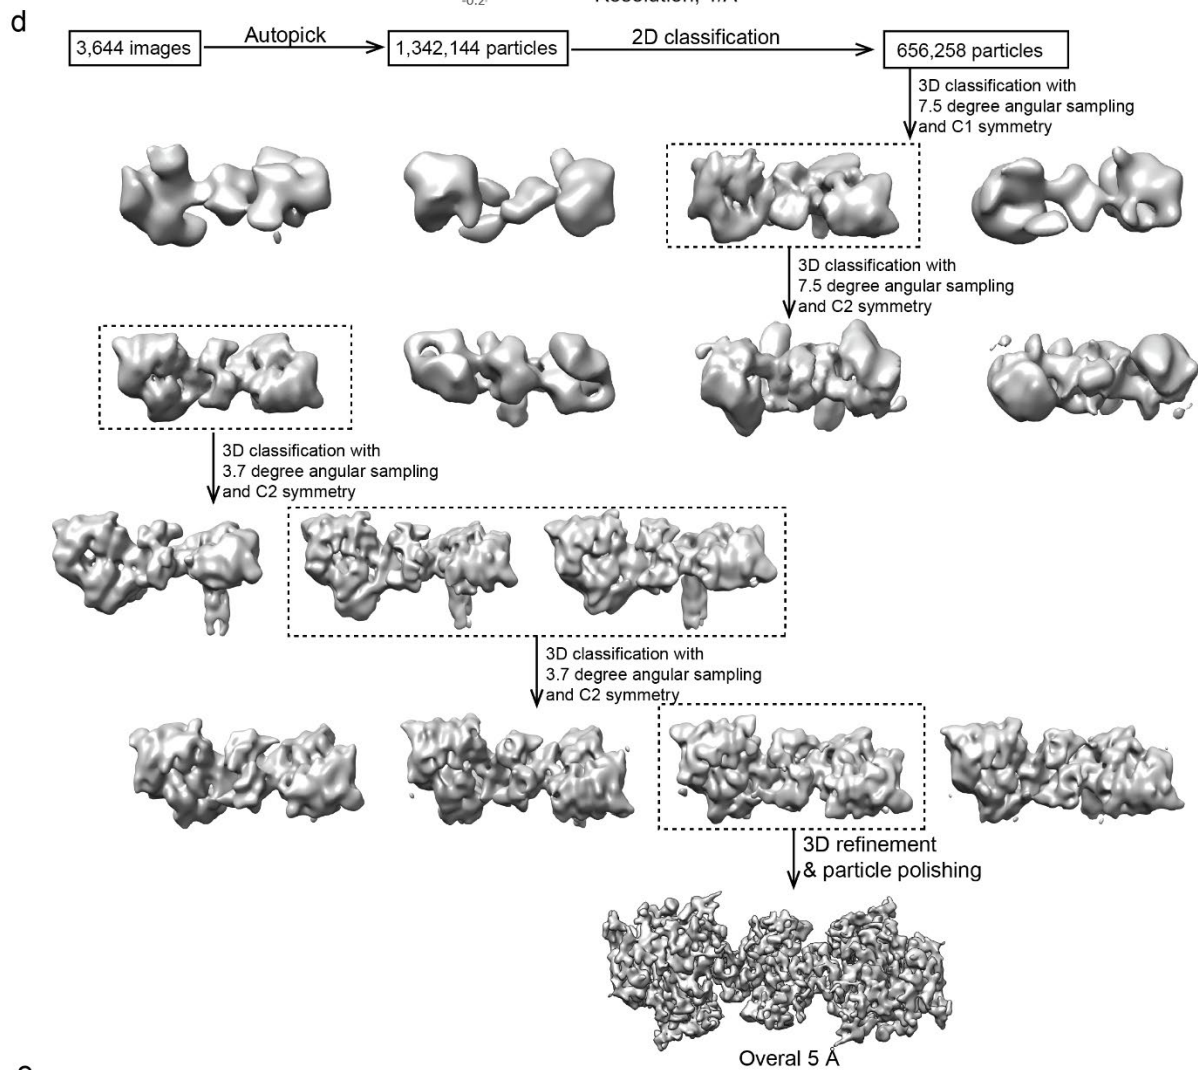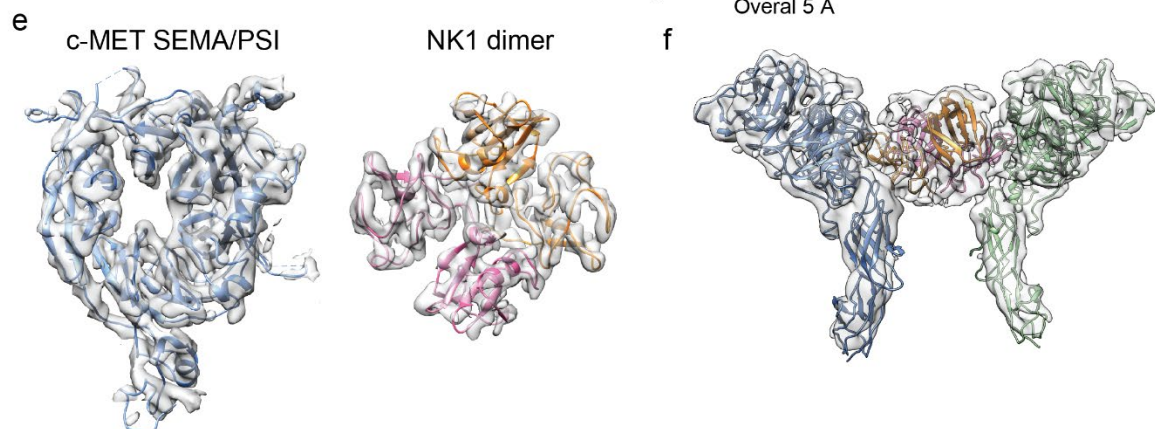

**Supplementary Figure 7. Cryo-EM analysis of c-MET927-LZ/NK1 complex.**

(a) Representative electron micrograph from total 3,644 micrographs and 2D class averages of c-MET927-LZ/NK1 complex. Scale bar: 50 nm. (b) Gold-standard Fourier shell correlation (FSC) curve for the cryo-EM map of c-MET/NK1 complex. (c) Cryo-EM map of c-MET/NK1 complex colored by local resolution. (d) Flowchart of cryo-EM data processing of c-MET/NK1 dataset. (e) Cryo-EM densities of c-MET and NK1 dimer. (f) The rigid body fitting of the models of SEMA-PSI-IPT1-IPT2 domains of two c-MET and dimeric NK1 into the cryo-EM map that is low-pass filtered by local resolution.

**Supplementary Table 1. Primers used in the study**

| Project                               | Oligo name                      | sequence                                                |
|---------------------------------------|---------------------------------|---------------------------------------------------------|
| Stable cell line for functional test  | cMetpLVXFW                      | CTATTTCCGGTGAATTCCTCGAGATGAAGGCCCCCGCTGTGCTT            |
|                                       | cMetpLVXRV                      | GGGGAGGGAGAGGGGGCGGGATCCCGTTCAAGTCTTCCTCGGAGAT          |
|                                       | pLVX_backbone_FW                | GGATCCCGCCCTCTCCCTC                                     |
|                                       | pLVX_backbone_RV                | CTCGAGGAATTCACCGGAAATAGATCC                             |
| cmet and HGF for protein purification | cMetpEZTFW                      | TAATACGACTCACTATAGGCTAGCGCCACCATGAAGGCCCCCGCT           |
|                                       | cMetpEZT927RV                   | GAGTGGAAAGCAAGCAATTTCTTCAGGTACCAGCAGCGGCCTGG            |
|                                       | HGF_FW                          | TAATACGACTCACTATAGGCTAGCATGTGGGTGACCAAACCTCC            |
|                                       | HGF_RV                          | CCCCGGGTCTTGAAGAGCACTTCGAGTGTCTCGCATGTTTTAAT<br>TGCACAG |
|                                       | HGF_NK1RV                       | GGTGGTGGTGGTCTCGAGAACTTCTGAACACTGAGGAATGTCAC            |
| cmet mutations for functional test    | cmet_K267AR384AE419A_FW         | CCTTTGGACCGTCAAGAAGTAAATAAAATTG                         |
|                                       | cmet_K267AR384AE419A_RV         | GAATATCGAACAGCCTTTACCACAGCTTTGC                         |
|                                       | cmet_Y369A373A_FW               | CACATGGCAGATCGATCCATTGGTTC                              |
|                                       | cmet_Y369A373A_RV               | CATGAGCACTGCTTTAATAGGACACTTCTG                          |
|                                       | cmet_R426AR469A_FW              | GGCCTGCAAAGCTGTGGT                                      |
|                                       | cmet_R426AR469A_RV              | CTCATGTGAATTTTCTCCTGGACTC                               |
|                                       | cmet_N382AF398A_FW              | GGACATCTCACGGCGTTTTTGT                                  |
|                                       | cmet_N382AF398A_RV              | GATGAATATCGAACAGAGTTTACC                                |
|                                       | cmet_K592EN593EK595EK599E<br>FW | GTCCCAGCCACATATGGTCAG                                   |
|                                       | cmet_K592EN593EK595EK599E<br>RV | CTTTAAGTGAGAGCACGATGAAT                                 |
|                                       | HGF point mutations             | 343536_F                                                |
| 343536_R                              |                                 | TCCTCCCTTTGTCCTCTGCATAG                                 |
| 47_F                                  |                                 | AAAATCAGCAGAGACTACCCTAATC                               |
| 47_R                                  |                                 | TTGAATTCATGAATTGTATTCTTC                                |
| 91_F                                  |                                 | TGTTTTTGATGAGGCAAGAAAACAATG                             |
| 91_R                                  |                                 | AAAGCCTTGCAAGTGAATG                                     |
| 112_F                                 |                                 | GAAAAAGAAGCCGGCCATGAATTTGACCTC                          |
| 112_R                                 |                                 | ACTCCAATTGACATGCTATTG                                   |
| 114_F                                 |                                 | AGAATTTGGCGAGGAATTTGACC                                 |
| 114_R                                 |                                 | TTTTTCACTCCACTTGAC                                      |
| 159_F                                 |                                 | GATACCACACCGGCACAGCTTTTTGCCTTC                          |
| 159_R                                 |                                 | ATGGAACTCCAGGGCTGA                                      |
| 195_F                                 |                                 | AAGCAATCCACGGGTACGCTACGAAGTCTG                          |

|  |             |                                    |
|--|-------------|------------------------------------|
|  | 195_R       | GTGAAACACCAGGGTCCC                 |
|  | 197_F       | TCCAGAGGTAGAGTACGAAGTCTGTGAC       |
|  | 197_R       | TTGCTTGTGAAACACCAG                 |
|  | 242_F       | GACACCACACGAGCACAAATTCTTGCC        |
|  | 242_R       | TGATGATCCCAGCGCTGA                 |
|  | 244_F       | ACACCGGCACGAGTTCTTGCCTG            |
|  | 244_R       | GGTGTCTGATGATCCCAG                 |
|  | 249_F       | CTTGCCTGAAGAGTATCCCGACAAGGGC       |
|  | 249_R       | AATTTGTGCCGGTGTGGT                 |
|  | 242244249_F | TTGCCTGAAGAGTATCCCGACAAGGGCTTT     |
|  | 242244249_R | GAACTCGTGCTCGTGTGGTGTCTGATGATC     |
|  | 321_F       | CAATACCATTCCGAATGGAATCCATGTCAG     |
|  | 321_R       | ACAGTGCCCTGTAGCCT                  |
|  | 336_F       | GTATCCTCACCGGCATGACATGACTC         |
|  | 336_R       | TGAGAATCCCAACGCTGA                 |
|  | 373_F       | TCCAAACATCGAGGTTGGCTACTGC          |
|  | 373_R       | TCAGTGGTAAAACACCAG                 |
|  | 361_F       | AGATGGGTCTCGGTCACCCTGGTG           |
|  | 361_R       | GGATTTCCGGCAGTAATTTTC              |
|  | 376_F       | CCGAGTTGGCGCCTGCTCCCAA             |
|  | 376R        | ATGTTTGGATCAGTGGTAAAAC             |
|  | 673_F       | TGAGGGGGATGCCGGTGGCCAC             |
|  | 673_R       | CATGGTCTGATCCAATCTTTTC             |
|  | 737678_F    | GAATGAAGGACTTCCATTCACTTGCAAGGCTTTT |
|  | 737678_R    | TCAGTACACTCATTAGCACATTGGTCTGCAGT   |

## Supplementary References

1. Niemann, H. H. *et al.* Structure of the human receptor tyrosine kinase met in complex with the *Listeria* invasion protein InlB. *Cell* **130**, 235-246, doi:10.1016/j.cell.2007.05.037 (2007).
